# Supplementary material for: De novo design, retrosynthetic analysis and combinatorial synthesis of a hybrid antiviral (VTAR-01) to inhibit the interaction of SARS-CoV2 spike glycoprotein with human angiotensin-converting enzyme 2
Source: Biol Open. 2020 Oct 19;9(10):bio054056. doi: 10.1242/bio.054056 (PMC7595696; doi:10.1242/bio.054056)
Supplement: Supplementary information [file biolopen-9-054056-s1.pdf]

## Supplementary Data

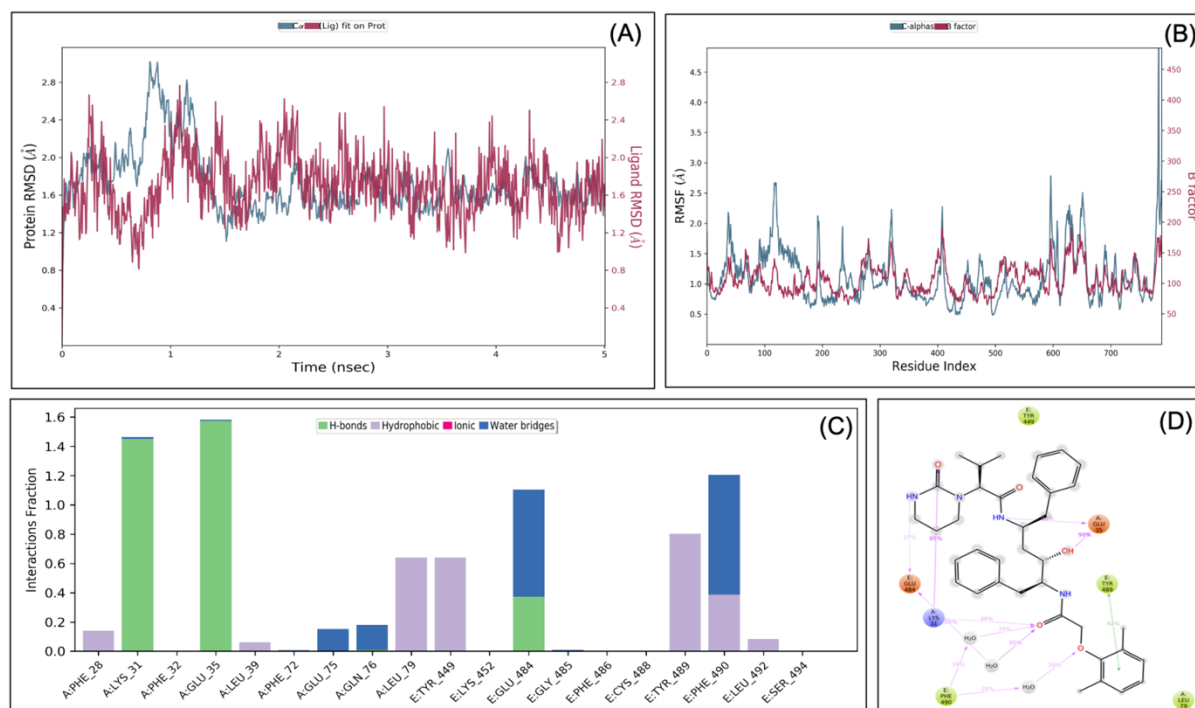

**Figure S1:** Root-mean-square deviation (A) and Root mean square fluctuations (B), Interacting residues (C), and the interacting fraction (D) during molecular dynamics simulation analysis of RBD-hACE2-lopinavir complex.

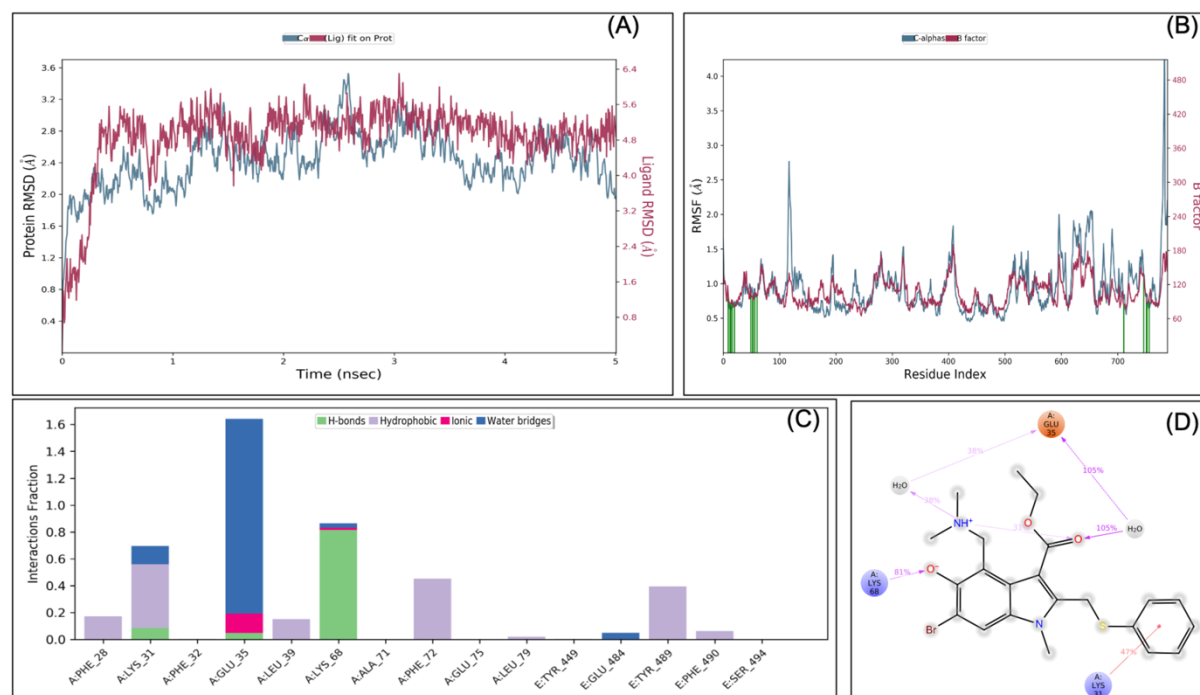

**Figure S2:** Root-mean-square deviation (A) and Root mean square fluctuations (B), Interacting residues (C), and the interacting fraction (D) during molecular dynamics simulation analysis of RBD-hACE2- umifenovir complex.

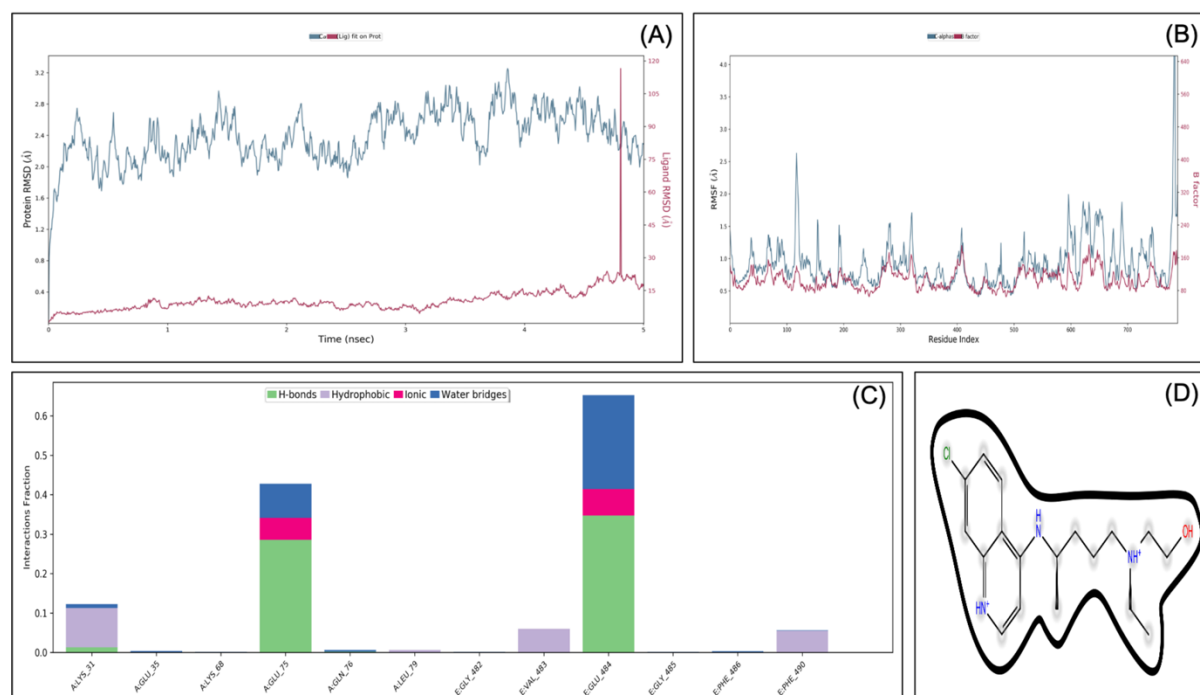

**Figure S3:** Root-mean-square deviation (A) and Root mean square fluctuations (B), Interacting residues (C) and the interacting fraction, (D) during molecular dynamics simulation analysis of RBD-hACE2-hydroxychloroquine complex.

**Table S1: Result showing outcome of GLIDE molecular docking in XP mode and Binding free energies result from Prime analysis using MMGBSA approach for the denovo designed hybrid molecule 'VTAR' and retrosynthesised hybrid molecule 'VTAR-01'**

| Name (Chemical Name)                                                                                                                                                                                 | Glide G-Score (in Kcal/Mol) | Glide E-Model (in Kcal/mol) | MMGBSA dG Binding (in Kcal/mol) |
|------------------------------------------------------------------------------------------------------------------------------------------------------------------------------------------------------|-----------------------------|-----------------------------|---------------------------------|
| VT-AR<br><br>(2S)-2-{1-[(2S,3S,4S)-3,4-dihydroxyoxolan-2-yl]-1H-1,2,4-triazol-3-yl}-4-hydroxy-5-oxo-2,5-dihydrofuran-3-olate                                                                         | -7.04                       | -45.56                      | -21.19                          |
| VT-AR-01<br><br>(3R,4R)-3-hydroxy-4-[(2-{[(3S,4S,5S)-4-hydroxy-5-{3-[(2S)-4-hydroxy-3-oxido-5-oxo-2,5-dihydrofuran-2-yl]-1H-1,2,4-triazol-1-yl}oxolan-3-yl]oxy}-2-oxoethyl)sulfanyl]pyrrolidin-1-ium | -7.80                       | -66.22                      | -29.00                          |

**Table S2: Result showing outcome of ADMET (Absorption, Distribution, Metabolism, Excretion and Toxicity)analysis of VT-AR-01. The prediction was performed using QikProp analysis.**

| ADMAT Properties | Value for VT-AR-01 |
|------------------|--------------------|
| Molecular Weight | 444.415            |
| H-bond Donor     | 5.0                |
| H-bond Acceptor  | 16.6               |
| Rotatable bonds  | 10                 |
| QP polrz         | 38.773             |
| QPlogP16         | 13.973             |
| QPlogPoct        | 30.714             |
| QPlogPw          | 26.114             |
| QPlogPo/w        | -2.676             |
| QPlogS           | -1.691             |
| QPlogHERG        | -5.844             |
| QPlogKhasa       | -1.197             |
| Metab            | 7                  |
